# Supplementary material for: A retrospective study: analysis of the relationship between lactate dehydrogenase and castration-resistant prostate cancer based on restricted cubic spline model
Source: PeerJ. 2023 Oct 6;11:e16158. doi: 10.7717/peerj.16158 (PMC10561638; doi:10.7717/peerj.16158)
Supplement: Supplemental Information 1 [file peerj-11-16158-s001.xlsx]

## Sheet: Data
age	nation(1=HAN,2=other)	somke	drink	PIN	high blood pressure	diabetes	triglyceride	HDL	LDL	triglyceride	calcium	alkaline phosphatase	T	Gleasson	TPSAngml	volumetric	fT	androstenedione	end	time	LDH	ADT
83	1	1	0	0	1	1	2	1	3.34	4.86	2.3	207.5	4	9	2356.6	119	0.11	2	1	9	107.6	3
77	1	0	0	0	1	1	1	1	2.44	3.22	2.18	101	2	7	9	30	0.07	7	1	30	119	2
73	1	0	0	0	0	0	1	1	1.91	3.17	2.34	60	3	8	9.98	57	0.11	20	1	25	124	3
69	2	0	0	1	0	0	1	1	2.98	4.23	2.11	162.1	4	9	415.6	49.4	0.13	18	1	25	125.4	1
70	2	1	1	0	1	0	1	1	1.78	3.01	2.25	72.6	2	8	43.9	37.8	0.14	6	1	25	128.1	1
59	1	1	0	1	0	0	1	1	2.17	3.12	2.13	64.94	2	9	89.24	42.5	0.28	7	1	60	133	1
89	1	0	0	0	0	0	1	1	1.6	2.67	2.27	61.6	4	9	309	67.8	0.02	14	1	23	136	3
73	2	1	0	1	0	1	1	1	2.76	3.85	2.22	66	4	8	587.2	45.2	0.11	8	1	16	138	3
65	1	1	1	1	0	1	1	1	2.91	4.17	2.37	254.6	4	9	58.4	25.3	0.7	21	1	8	138.3	1
74	2	1	0	0	0	0	1	1	1.79	2.99	2.2	282	4	8	683.55	47.4	0.1	15	1	6	139	2
76	2	1	0	1	0	0	2	2	3.57	5.76	2.41	61.2	2	7	95	41	0.48	15	1	12	144	1
66	2	0	0	1	0	1	1	1	3.94	5.6	2.36	70	3	8	21	72	0.12	12	1	21	146	2
73	2	1	0	0	0	0	2	1	2.2	4.52	2	213	3	6	150	63.3	0.01	#NULL!	1	25	146	3
70	2	1	0	0	0	1	3	1	2.19	3.48	2.12	83	4	9	2142	69.9	0.07	18	1	22	146.6	3
68	2	0	0	0	0	0	1	1	1.94	3.73	2.3	64.6	2	9	737.5	77.7	0.14	11	1	14	148	1
81	1	0	0	0	1	1	2	1	1.6	2.87	2.18	132	3	8	57.27	70	0.14	12	1	34	148	3
88	1	1	1	0	1	0	1	1	1.34	2.69	2.17	417	2	8	130.5	56.6	0.01	2	1	24	149	2
60	1	1	0	0	0	0	1	1	2.5	3.58	2.1	96.3	2	9	123.31	47.8	0.39	5	1	31	150.9	1
81	1	0	0	1	1	0	1	2	1.34	2.7	2.07	40.8	4	8	695.51	113	0.15	17	1	10	151	2
76	1	1	0	0	1	1	2	1	2.82	4.23	2.38	109.1	2	10	107.12	40	0.34	17	1	18	151.8	3
53	2	1	0	0	1	0	1	1	2.3	3.28	2.14	280.5	2	7	200	65	0.52	11	1	11	152	1
67	1	0	0	1	0	0	2	1	3.36	4.76	2.12	72	3	8	190.5	23.6	0.11	#NULL!	1	20	152	2
71	1	1	0	0	1	0	2	1	3.96	5.77	2.4	134.9	2	7	150	64.6	0.04	#NULL!	1	12	153	1
89	1	0	0	0	0	1	1	1	2.38	1.3	2.22	50.6	2	8	53.44	63	0.05	11	1	14	153.2	1
80	1	1	1	0	1	0	1	1	2.85	4.01	2.13	161	2	10	863.3	52	0.3	16	1	7	155	2
88	1	0	0	1	0	0	1	1	1.96	3.48	2.1	439.9	4	8	19648	76.5	0.01	22	1	12	155	3
88	1	0	0	1	1	0	1	1	2.46	3.58	2.1	440	4	8	19648	76.5	0.01	22	1	12	155	3
77	1	0	0	1	0	1	1	1	2.76	4.45	2.49	129	4	9	1728.3	54.7	0.16	12	1	14	157	2
74	1	0	0	1	1	1	1	1	2.25	4.12	2.21	108.4	2	8	51.88	40.37	0.17	13	1	28	159.7	1
68	2	0	0	0	0	0	2	1	2.97	4.23	2.33	86	4	8	2472	34.9	0.22	#NULL!	1	16	160	2
81	1	1	0	0	1	1	1	1	1.87	3.33	2.03	77	3	8	123.6	53.9	0.36	7	1	14	160.2	3
65	1	0	0	0	0	0	1	1	3.25	4.82	2.12	77.2	3	9	23.3	102	0.28	11	1	40	160.3	2
78	2	1	0	1	1	1	1	1	2.24	3.71	2.24	99	4	8	668	71.4	0.14	17	1	12	162	2
67	2	1	0	0	0	0	1	2	2.34	4.28	2.34	129	2	9	901	60	0.29	#NULL!	1	24	162	1
71	1	0	0	0	1	0	1	1	2.68	5.18	2.33	56	4	8	150.6	58.4	0.25	9	1	38	163	3
76	2	1	0	1	1	1	2	1	2.19	3.24	2.24	143.3	3	8	94.64	85.7	0.06	10	1	34	163.1	2
79	1	0	0	1	0	1	2	1	2.92	4.72	2.07	128.5	3	8	886.1	67.57	0.02	14	1	9	163.4	2
56	1	1	1	0	0	1	2	1	1.46	3.23	2.25	64.3	4	8	8486	40.4	0.18	16	1	18	164.1	1
71	2	1	0	0	0	0	1	1	2.11	3.58	2.22	144	2	9	285	126	0.08	#NULL!	1	13	165	1
69	1	1	0	0	0	1	3	1	3.22	4.79	2.27	373.4	2	8	120	52	0.05	12	1	10	165.1	1
47	2	1	0	1	0	0	1	1	3.33	4.52	2.2	258	3	9	85.9	24	0.26	14	1	8	168	2
89	2	0	0	6	1	1	1	1	2.96	4.19	2.07	54	4	10	24.8	87.9	0	15	1	15	169	3
75	1	1	0	0	1	0	2	1	#NULL!	3.44	2.06	189	2	7	226	52.2	0.18	8	1	35	169	1
69	2	0	0	1	1	1	2	1	2.41	4.58	2.38	101.2	3	8	312.3	80.4	0.1	12	1	7	171.5	2
60	2	1	1	0	0	0	3	1	2.39	4.22	2.25	151.9	4	9	3579	92.3	0.17	0	1	11	172	3
63	2	0	0	0	1	1	1	1	3.31	4.92	2.25	118	4	8	444.58	66.27	0.05	12	1	12	172	1
57	2	1	0	0	0	0	2	1	3.43	4.99	2.15	90	2	8	342	34.5	0.12	7	1	23	172	1
76	1	0	0	0	1	0	1	2	2.96	5.23	2.29	90.6	4	9	8317	44	0.18	12	1	21	172.2	2
58	2	0	0	1	1	0	1	1	2.86	4.29	2.29	107.2	4	10	325.1	137.3	0.19	2	1	18	173	3
67	2	0	0	0	0	0	1	1	4.18	5.63	2.3	250.3	4	8	150.02	#NULL!	0.34	#NULL!	1	16	174.2	2
73	2	1	1	1	0	0	1	1	3.15	4.52	2.25	159	2	8	333.58	34	0.03	11	1	44	174.8	1
86	1	0	0	1	1	0	1	1	2.03	1.53	2.18	250.5	4	7	135.45	35.6	0.24	11	1	20	175	1
60	2	0	0	0	1	1	1	1	2.19	3.41	2.13	62	4	9	90.4	71	0.38	16	1	40	175	1
68	2	1	0	1	0	1	1	2	2.16	3.58	2.3	555.59	2	7	37.24	35.6	0.29	#NULL!	1	12	176	3
79	1	1	0	0	0	0	1	2	3.38	4.78	2.05	89	3	7	2717	31	0.06	14	1	34	176.6	1
63	1	1	0	0	0	0	3	1	2.65	4.19	2.21	99.2	3	9	63.9	53.2	0.25	15	1	32	176.7	2
77	1	0	0	0	0	0	5	1	4.85	3.12	2.31	80.3	4	9	128.8	56.12	0.08	12	1	20	179.7	2
81	1	0	0	0	1	1	3	1	1.31	3.77	2.12	164.5	3	7	87.9	53	0.12	16	1	12	180.2	1
64	2	1	1	0	1	1	2	1	2.01	2.65	2.04	71	2	8	220.7	56.6	0.09	13	1	7	181	1
76	2	0	0	0	1	0	2	1	1.6	2.5	2.18	135	3	10	4245	41	0.04	19	1	20	181	2
67	1	1	1	1	0	1	4	2	3.24	5.4	2.16	85.4	3	9	90.99	41.19	0.25	11	1	30	181	3
75	1	1	0	0	1	0	1	1	2.73	3.98	2.04	686	2	7	97.8	35	0.4	4	1	45	181	3
77	2	0	0	0	0	0	1	1	2.95	4.01	2.15	198	2	8	88	36.5	0.1	18	1	26	184.2	1
69	1	1	0	1	1	1	1	2	4.13	5.62	2.28	103	2	9	90	24	0.11	5	1	29	184.6	1
72	1	0	0	1	1	1	1	1	1.51	3.1	2.28	525.8	3	8	950	20.4	0.08	18	1	60	185.5	3
67	1	0	0	0	0	0	1	1	1.76	3.11	2.18	93	2	8	406.3	46	0.17	11	1	16	186	1
67	1	0	0	0	0	0	1	1	1.76	3.11	2.18	93	2	8	406.3	46	0.17	11	1	16	186	1
77	1	1	0	0	0	0	1	1	2.89	4.79	2.03	101	4	10	2051	170	0.2	9	1	11	187	2
81	1	1	1	1	1	1	2	1	1.33	2.51	2.16	522.4	3	8	997.5	47.7	0.16	721	1	13	187.7	1
67	2	0	0	1	0	0	1	1	3.26	4.43	2.12	102.2	4	9	80.22	33.5	0.56	13	1	12	189	2
58	2	0	0	1	1	0	1	1	3.6	5.2	2.28	129	4	8	240	56	0.83	12	1	9	189.2	3
79	1	1	1	1	0	0	1	1	2.72	3.52	2.14	107.3	4	7	74.1	80	0.07	11	1	13	189.5	2
78	1	0	0	0	1	0	2	1	3.13	4.61	2.23	58	3	10	110.14	73	0.24	7	1	28	190	3
72	2	0	0	0	1	1	1	1	2.5	3.7	2.18	86	4	8	146.58	53.25	0.12	11	1	30	190	3
74	1	1	1	0	0	0	1	2	2.27	4.46	2.99	125.4	3	8	101	100	0.01	15	1	18	191	2
69	1	1	0	0	1	1	1	1	2.69	4.37	1.73	365.8	2	8	1891.5	34.4	0.09	9	1	8	191.2	1
78	1	0	0	1	0	0	1	1	3.43	4.69	2.31	301.1	4	9	148.53	13.18	0.11	25	1	16	191.4	1
68	2	0	0	1	0	0	1	1	2.86	4.55	2.08	1494	2	9	143.14	37	0.39	4	1	15	191.5	3
76	1	0	0	0	0	0	1	1	3.35	4.86	2.42	777.3	3	8	1612	52	0.12	15	1	25	192	3
65	1	1	0	0	1	1	1	1	2.62	4	2.36	722	4	9	128.04	56.4	0.32	10	1	39	193	3
66	2	1	0	0	0	0	2	1	3.26	4.69	2.37	68.6	4	8	79.26	121	0.19	18	1	15	193.1	2
79	2	0	0	1	1	0	1	1	2.34	3.87	2.17	150.9	4	9	149	58	0.23	5	1	27	195.3	3
77	1	0	0	0	1	1	1	1	2.79	3.63	2.07	152	3	8	92.7	76.44	0.15	10	1	23	196	2
80	1	0	0	0	0	0	2	1	4.27	5.35	2.01	380.8	3	9	4551.5	26.86	0.27	7	1	12	196.1	2
77	1	0	0	0	1	0	1	1	2.69	4.16	2.32	368	4	8	587.6	105.2	0.01	11	1	25	197	3
81	1	0	0	0	0	1	1	3	2.78	4.36	2.45	134	2	8	211.2	64.4	0.03	#NULL!	1	15	198	1
86	1	1	0	0	1	1	1	1	3.69	3.06	2.07	153.2	4	8	221.23	46.51	0.05	5	1	20	199	3
58	1	0	0	0	0	0	1	2	5.03	2.86	2.31	98.2	3	9	36.48	41.76	0.19	14	1	20	200.5	2
73	1	0	0	1	1	0	1	1	1.31	2.49	2.11	86	4	9	28.9	30	0.06	12	1	20	201	1
73	1	1	0	1	1	0	1	1	1.31	2.49	2.1	86	4	9	28.9	30	0.09	12	1	20	201	2
49	1	0	0	0	1	1	2	1	2.79	3.77	2.06	230	2	9	1290	45	0.01	17	1	23	202	1
65	2	0	0	0	1	0	1	1	1.7	2.76	2.34	106	3	8	1670	76	0.57	22	1	16	203.8	2
64	1	0	0	0	1	1	3	1	4.25	2.56	2.3	69	4	9	481.2	45.43	0.12	#NULL!	1	26	209	2
76	2	0	0	0	1	0	2	1	2.35	3.61	2.25	135	3	10	4245	41	0.45	19	1	20	211	3
73	2	1	0	0	0	0	1	1	2.29	3.3	2.14	112.3	4	8	391.2	70.01	0.01	12	1	12	213.2	3
69	2	0	0	0	0	0	1	1	4.22	2.83	2.27	242.6	4	10	5330	35	0.04	19	1	8	214	1
65	2	1	0	0	0	1	1	2	4.76	3.08	2.2	396.6	4	9	414.1	38.99	0.17	7	1	10	217	2
67	2	0	0	0	0	0	1	1	3.6	4.87	2.2	90.9	4	10	391	361	0.15	#NULL!	1	25	217	2
72	2	0	0	1	1	0	1	1	2.3	4.29	2.41	112	4	8	218.6	120	0.27	26	1	22	220	1
68	2	0	0	1	1	1	1	1	4.54	3.31	2.08	284.1	4	10	6488	129.9	0.02	4	1	11	221	2
67	2	0	0	1	0	1	2	1	3.23	4.82	2.23	344	4	8	215.2	79.5	0.14	10	1	18	221	3
65	2	1	0	1	1	1	4	1	4.43	5.95	2.16	1965	4	9	293.2	60	0.05	19	1	12	225	2
77	1	1	1	0	0	0	1	1	2.89	4.88	3.16	389	4	10	533	52	0.07	15	1	14	225	2
59	2	1	0	0	0	0	1	1	3.17	4.04	1.99	837.2	4	9	328.7	50	0.21	18	1	18	225	1
70	1	0	0	0	0	1	1	1	0.89	1.98	2.06	388	4	9	491.7	26.69	0.05	19	1	8	228.9	2
59	2	0	0	1	1	1	2	1	3.21	4.48	2.06	116	4	8	99.36	32	0.47	#NULL!	1	16	230	2
71	1	1	0	1	0	1	2	1	3	4.46	2.16	332	3	7	80.59	117.3	0	12	1	7	232	3
76	1	0	0	1	1	1	2	1	2.65	4	2.35	276	4	8	960.5	76	0.24	22	1	15	240	2
66	1	0	0	0	1	1	2	1	2.6	3.89	2.21	199.9	3	10	15.67	74.36	0.06	15	1	21	240	2
81	1	1	0	0	0	0	1	0	2.7	3.6	1.91	976.9	3	8	644.4	32.7	0.1	6	1	16	241.6	3
83	1	1	1	0	1	1	2	1	2.84	4.01	2.17	700	4	9	176.01	30.4	0.14	15	1	10	244.4	1
62	2	0	0	0	0	1	3	1	3.56	5.58	2.26	110	4	8	411.7	38.4	0.23	22	1	19	246	2
82	2	1	1	0	0	0	2	1	3.9	2.58	2.06	110.1	4	9	239	32	0.16	13	1	24	246	3
82	2	1	1	0	0	0	2	1	2.58	3.9	2.06	110.1	4	9	239	32	0.16	13	1	24	246	3
74	1	0	0	0	0	1	1	1	2.06	3.52	2	339	4	9	143.5	53.4	0.13	8	1	21	251	3
73	1	1	1	0	0	0	1	1	2.73	4.21	2.09	678.6	4	7	40.4	35.3	0.11	15	1	22	251.2	1
74	2	0	0	1	1	0	4	1	2.87	4	2.27	751.1	4	10	77.4	109.2	0.23	18	1	9	251.8	2
65	2	0	0	1	1	1	1	1	2	3.3	1.97	215	4	9	153	71	0.12	16	1	22	255	1
53	1	0	1	1	0	1	4	1	3.65	5.06	2.42	170	3	9	352	64	0.01	14	1	13	258	3
81	1	1	1	1	1	1	2	0	1.33	2.51	2.1	522.4	3	8	997.5	35.6	0.16	#NULL!	1	9	261	3
78	2	1	0	0	1	0	1	1	2.66	3.87	2.2	142.4	4	6	120.7	70.2	0.01	12	1	7	278	1
79	1	1	0	1	0	0	1	2	3.4	5.39	2.26	76	4	10	899.6	41.9	0.01	18	1	20	279	3
79	2	1	0	0	0	1	1	1	1.76	3.01	1.94	1137	4	7	107.43	46	0.2	9	1	22	285	2
79	1	0	0	1	1	0	1	1	4	5.44	2.21	362	4	10	763.5	48	0.05	8	1	17	289.5	3
85	2	0	0	1	0	0	1	1	3.04	5.02	2.32	84	2	9	726	55	0.24	#NULL!	1	16	291	1
56	2	1	1	0	0	1	1	1	3.17	4.84	2.28	572	4	8	26.47	31	0.1	#NULL!	1	14	295	1
64	2	0	0	1	1	0	1	1	3.29	4.7	2.1	631.4	3	8	935	55.9	0.12	16	1	11	310	3
69	2	0	0	0	1	0	1	1	3.37	4.46	1.95	95	2	7	81.9	174.4	0.22	8	1	15	312	1
69	2	0	0	0	1	0	1	1	3.37	4.46	1.95	95	2	7	81.9	174.4	0.22	8	1	15	312	1
77	1	0	0	0	1	0	1	1	1.56	4.3	2.12	175	4	10	687.8	59	0.45	20	1	48	320	1
61	2	0	0	1	0	0	1	1	2.56	4.19	2.41	198.6	4	8	1088	44	0.15	14	1	16	335.8	3
79	1	1	1	1	0	0	1	1	2.2	3.1	2.3	388.5	4	10	596	61	0.2	11	1	15	341.3	1
75	1	1	0	0	0	0	1	1	2.76	4.18	2.02	402	4	9	796.2	60.9	0.17	14	1	16	385	3
78	2	1	1	1	1	0	1	1	2.32	3.38	2.15	507	4	8	266.45	35	0.09	10	1	9	397	2
66	1	1	1	0	0	1	1	1	1.93	2.95	1.73	837	4	9	2164.8	42.7	0.12	#NULL!	1	10	398.8	2
79	1	0	0	0	0	0	2	1	2.83	4.52	2.19	220	2	8	1477	28	0.04	#NULL!	1	17	421	1
61	2	0	0	1	1	0	1	1	1.85	2.95	2.06	1094	4	8	8460	25.4	0.21	8	1	7	442	1
66	1	1	1	1	1	0	1	1	2.69	4.14	2	361.9	2	9	253.5	27	0.08	0	1	21	442.8	1
71	2	0	0	1	0	0	2	1	3.79	5.48	2.37	107.7	4	8	63.39	16.05	0.34	12	1	12	464	2
77	2	0	0	1	1	1	1	1	2.32	3.53	2.13	1140	3	9	956	35.2	0.14	16	1	16	513.3	2
71	1	0	0	0	0	1	1	1	2.52	3.66	2.24	2767	3	8	39	38	0.1	11	1	27	552.1	3
81	1	0	0	1	0	0	1	1	3.08	0.41	2.1	1724	4	10	351	50.9	0.14	6	1	13	559.3	3
86	2	0	0	0	0	1	1	1	2.13	3.44	2.2	111.8	2	10	134	108	0.19	#NULL!	1	13	592.8	3
63	1	0	0	0	0	0	1	1	2	3.47	2.02	680.7	3	8	637	34.5	0.86	5	1	9	735.6	3
69	1	1	0	1	1	1	1	1	3.59	4.05	1.84	337.8	3	8	4407	24.2	0.1	8	1	9	812.5	2
70	2	0	0	1	1	0	1	1	2.38	3.79	2.19	1004	4	8	4547	10	0.09	35	1	8	1415.9	2
82	1	1	0	1	1	1	1	1	1.9	3.62	1.72	332	4	8	574.54	20	0.29	15	1	15	1667	2
